# Supplementary material
Source: Springer Nature journal article supplement (https://www.springermedizin.de/resource/supplementary/12913_2014_3493_MOESM2_ESM.pdf/9532998)
Supplement: MOESM2 [file 9532998]

## SECTION 2: FINANCIAL POLICIES AND PROCEDURES

### Core Competencies

- The organization has approved financial policies and procedures which are properly disseminated and consistently followed. (EV)
- Approved policies and procedures USG complaint and address areas of grants management, budgeting, accounting, payroll, procurement, travel, accounts payable, accounts/contract receivable and cash management. 45 CFR Part 74; 2 CFR Part 220, 230 (RV)
- Written policies and procedures are developed to determine reasonableness, allocability, and allowability of costs. 2 CFR Parts 220 Appendix A (C) and Part 230 Appendix A (A); 45 CFR Part 74.21 (RV)
- Written policies and procedures are in place to minimize the time elapsing between transfer of advance funds to recipient and issuance of checks or payments 45 CFR Part 74.22 (RV)

### Open-Ended Questions

- Discuss who develops and approves the policies and procedures that the organization is expected to follow. (RV)
- How are policy changes / updates made and communicated to staff? (EV)
- Discuss areas covered by fiscal policies and procedures. (EV)
- How does the organization monitor and track actual use of the policies? (EV)
- Describe how the policies and procedures comply with USG financial requirements. (RV)

| Performance Criteria                                                                    | Verification Information                                                                                                                                                                                                                                                             | Comments |
|-----------------------------------------------------------------------------------------|--------------------------------------------------------------------------------------------------------------------------------------------------------------------------------------------------------------------------------------------------------------------------------------|----------|
| 1. There are current written financial policies and procedures                          | <ul style="list-style-type: none"><li>a. Written policies and procedures exist and are available for review</li><li>b. Employees know processes, but no written policies</li><li>c. All processes in writing, but not official policy</li><li>d. Some processes in writing</li></ul> |          |
| 2. Accounting policies and procedures have been approved by the organization leadership | <ul style="list-style-type: none"><li>a. Policies have been approved and adopted by organization</li><li>b. Governance minutes reflect approval</li><li>c. Management meeting minutes reflect approval</li><li>d. Staff not sure</li></ul>                                           |          |
| 3. Accounting policies are shared with program managers and decision-makers:            | <ul style="list-style-type: none"><li>a. Policies shared at department meetings</li><li>b. Policies shared at management meetings</li><li>c. Staff receive management memos or letters</li><li>d. Varies depending on decisions and/or staff</li></ul>                               |          |
